# Supplementary material for: A prospective evaluation of whole brain volume loss and neurocognitive decline following hippocampal-sparing prophylactic cranial irradiation for limited-stage small-cell lung cancer
Source: Springer Nature journal article supplement (doi:10.1007/s11060-019-03235-7), 2019-07-13
Supplement: MOESM1 [file 16926946]

Supplemental Table: Outcomes of multivariate linear regression correlating changes in measures of verbal memory and changes in whole brain volume at 12 months after PCI (n=13).

| Outcome | Predictor | β | P-value | R2 | Covariates |
| --- | --- | --- | --- | --- | --- |
| HVLT-R  Delayed Recall | Absolute change in whole brain volume (mL) | 0.028/mL | 0.42 | 0.39 | Baseline MMSE  Age |
| Proportional change in whole brain volume (%) | 0.41/% | 0.31 | 0.43 | Baseline MMSE  Age |
